# Supplementary material for: Efficient Knockout and Functional Analysis of BSSS-Related Genes by Episomal Expression Vector Containing Cas9 and AMA1 in Acremonium Chrysogenum
Source: Research Square preprint supplement (doi:10.21203/rs.3.rs-1419582/v1), 2022-03-11
Supplement: Supplementary file 1 [file 70acdd9304b75e43ec0b79d5.docx]

Biotechnology Letter

Supplementary Materials

Efficient knockout and functional analysis of BSSS-related genes by episomal expression vector containing Cas9 and AMA1 in Acremonium chrysogenum

**Supplemental Figures**

**
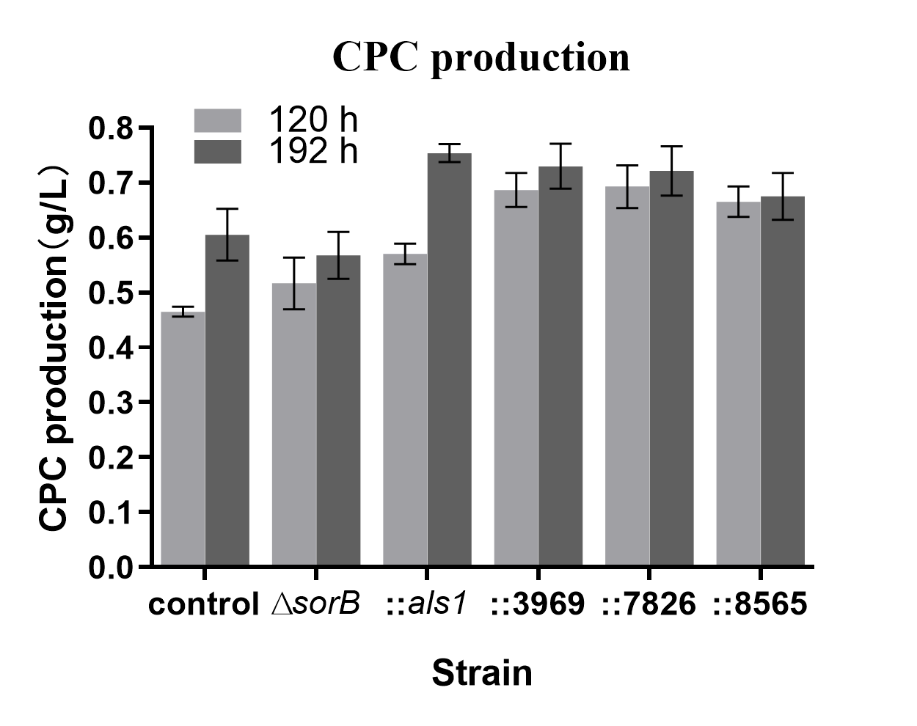
**

Fig. S1 CPC production in 120 h and 192 h by different modified strains
